# Supplementary figures and images for: CD133 is a positive marker for a distinct class of primitive human cord blood-derived CD34-negative hematopoietic stem cells
Source: PubMed Central journal article supplement — Leukemia. 2013 Nov 26;28(6):1308–15. doi: 10.1038/leu.2013.326 (PMC4051213; doi:10.1038/leu.2013.326), 2013-11-26

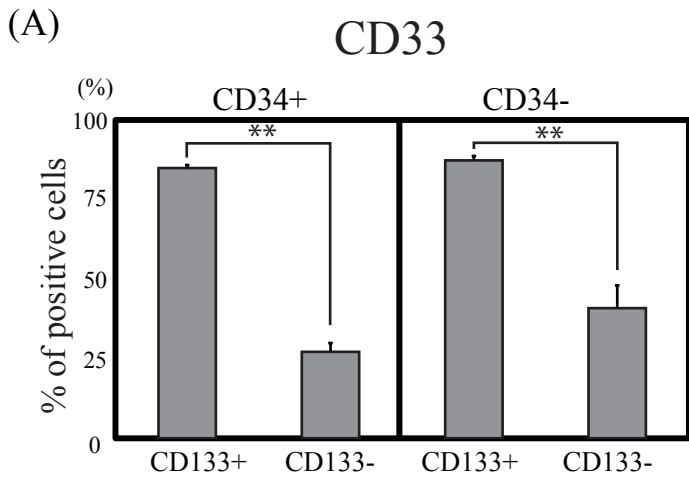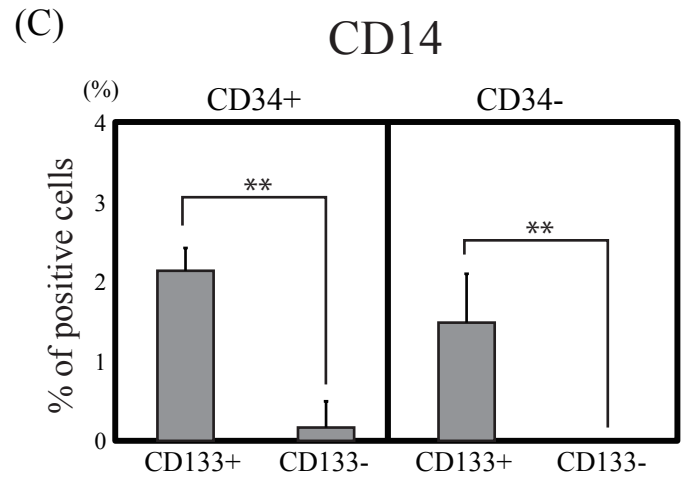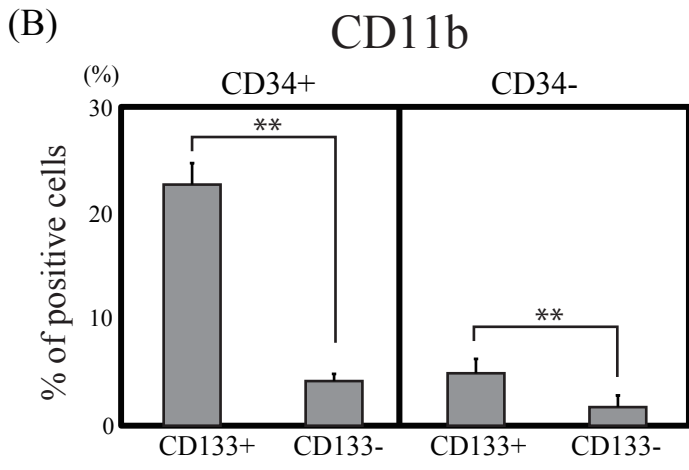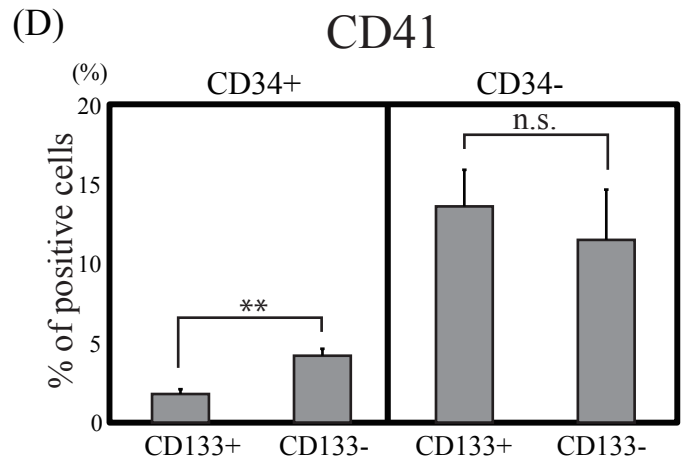

Supplement: leu2013326x3.pdf [file leu2013326x3.pdf]

(A) CD34<sup>+</sup>CD133<sup>+</sup>

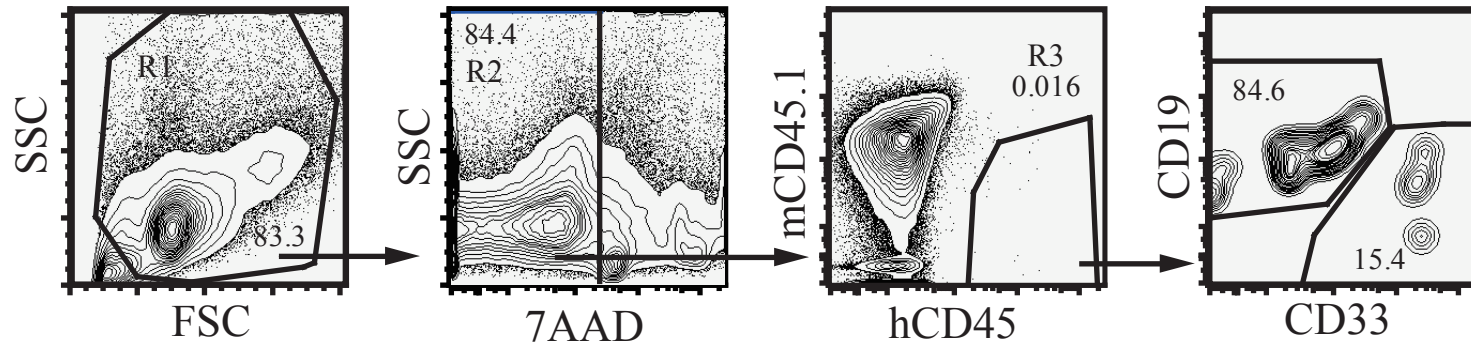

(B) CD34<sup>-</sup>CD133<sup>+</sup>

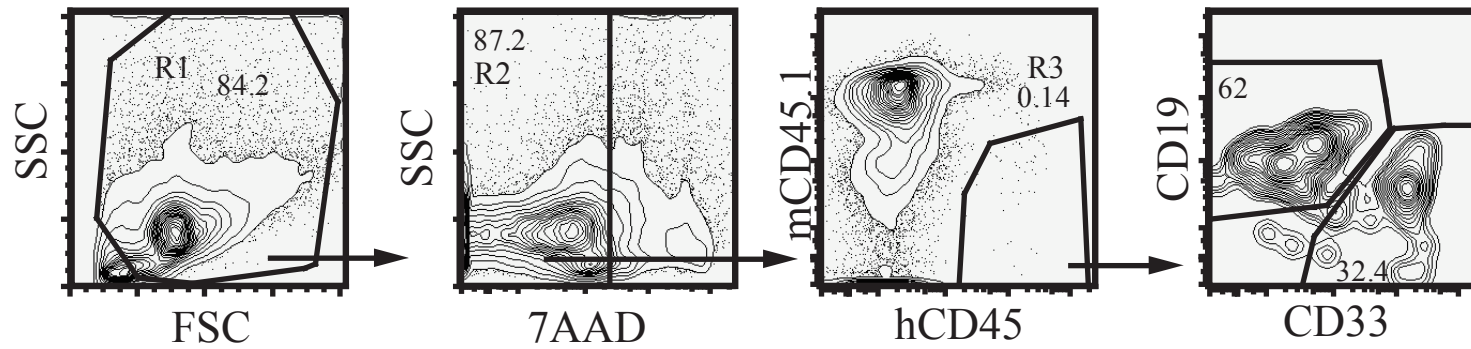

Supplement: leu2013326x4.pdf [file leu2013326x4.pdf]

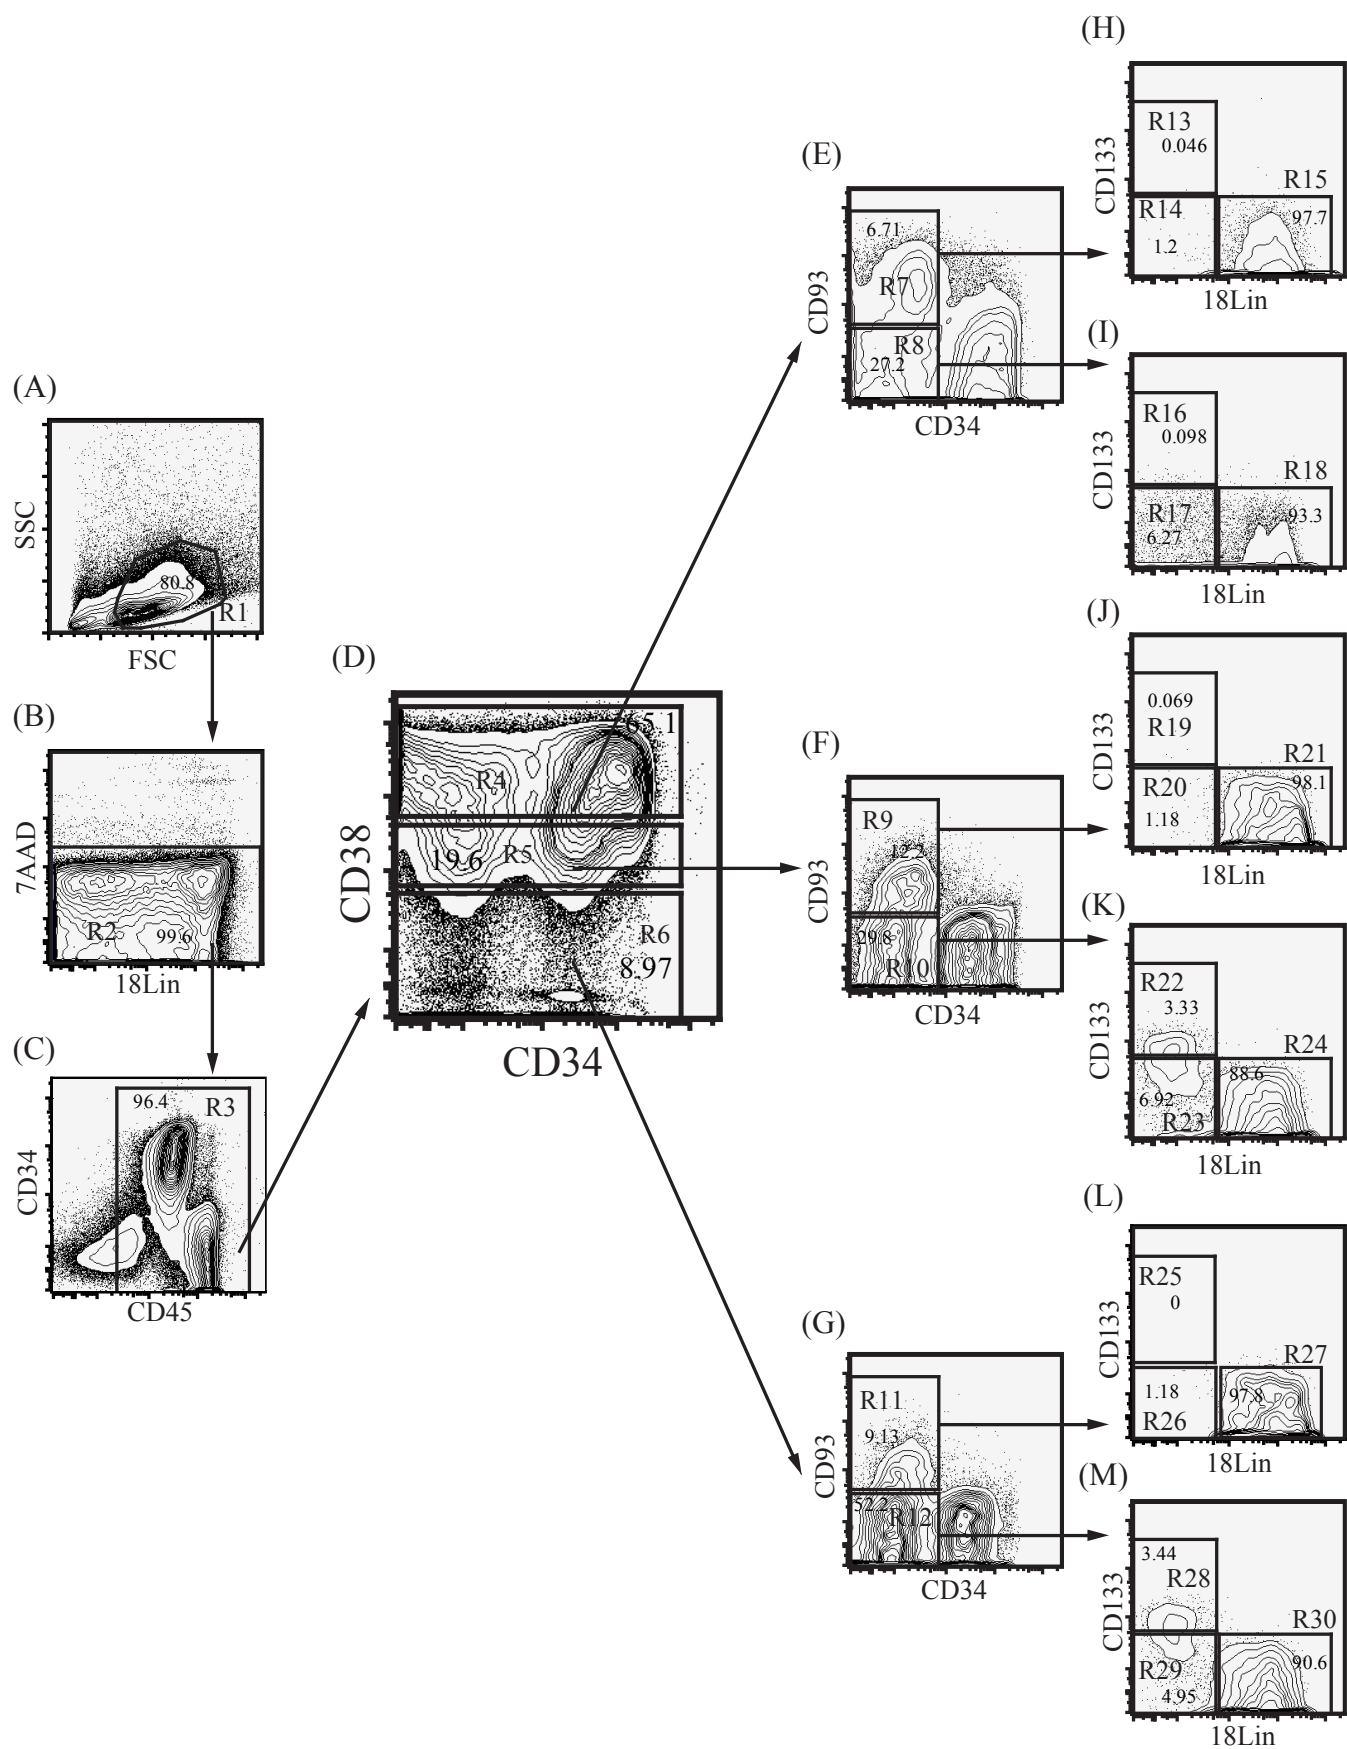

Supplement: leu2013326x5.pdf [file leu2013326x5.pdf]
